# Supplementary material for: A study on the co-reaction of benzoxazine and triazine through a triazine-containing benzoxazine
Source: Royal Society of Chemistry journal article supplement (doi:10.1039/c5ra23760b), 2016-01-01
Supplement: c5ra23760b1.pdf [file c5ra23760b1.pdf]

## Supporting Information

### Study on the co-reaction of benzoxazine and triazine through a triazine- containing benzoxazine

Ching Hsuan Lin,\* Yu Chun Chou, Meng Wei Wang, Ru Jong Jeng

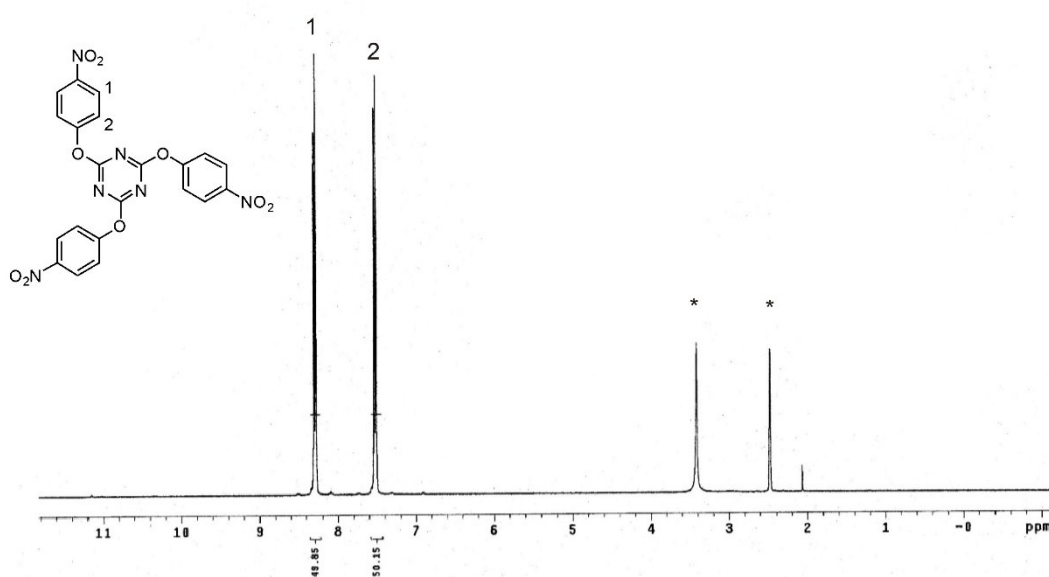

Figure S1. <sup>1</sup>H-NMR spectrum (400 MHz) of **tnt**.

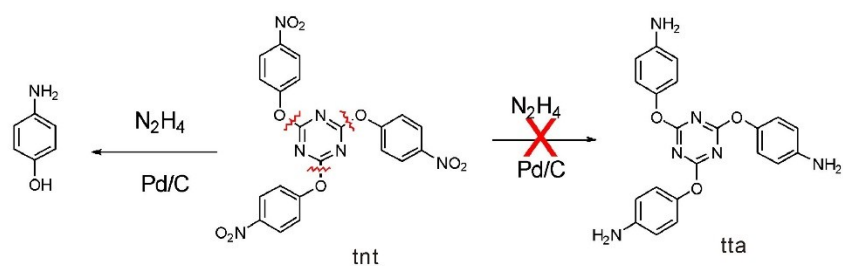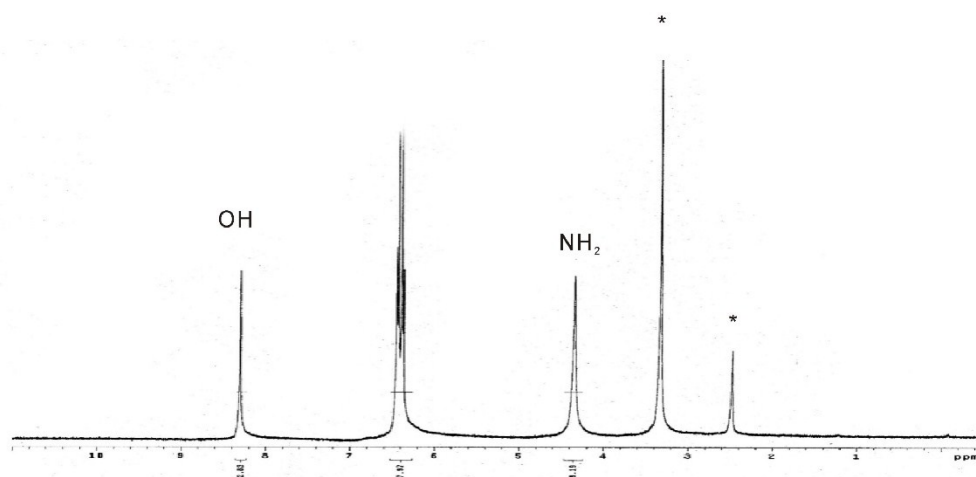

Figure S2.  $^1H$ -NMR spectrum (400 MHz) of the hydrogenation product of **tnt** by using hydrazine hydrate as reducing agent.

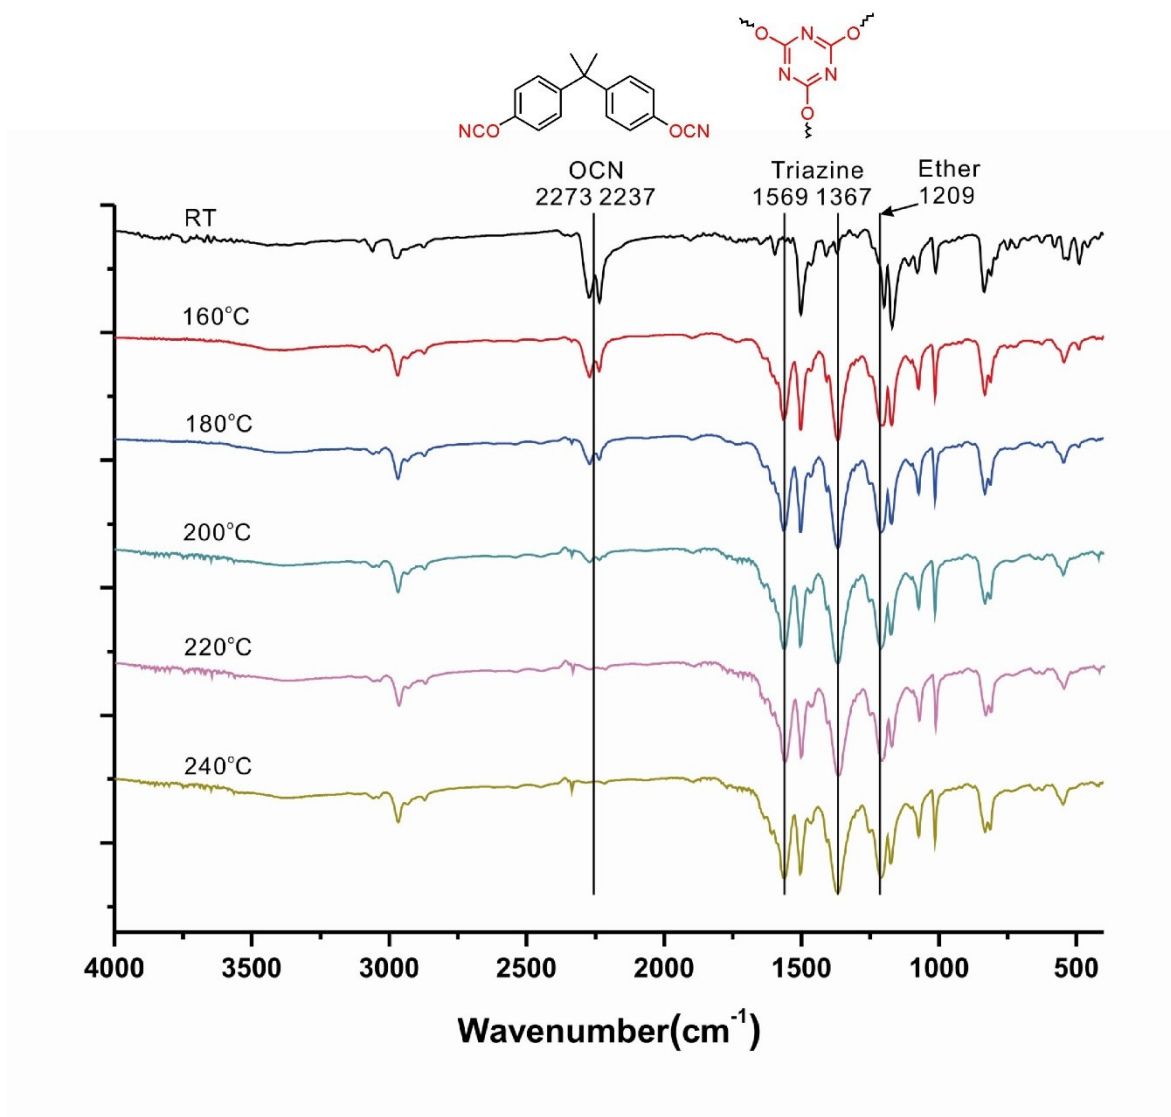

Figure S3. FT-IR spectra of BACY after accumulative curing at each stage for 20 min.

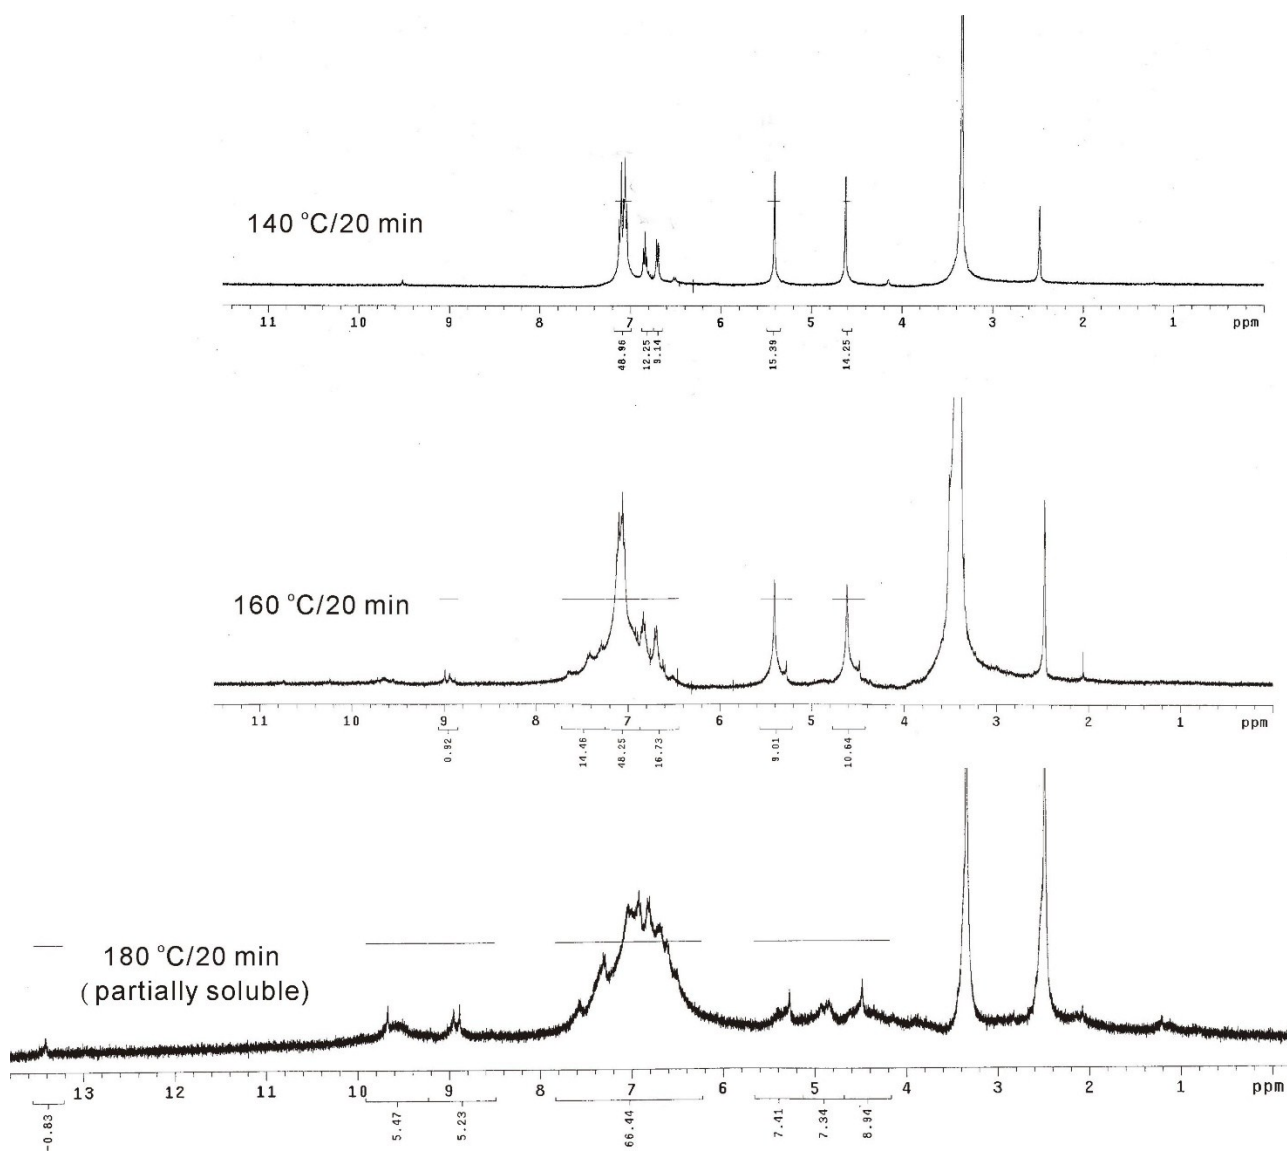

Figure S4.  $^1\text{H-NMR}$  spectra of **P-tta** after thermal treatment at 140, 160, and 180 °C for 20 min.

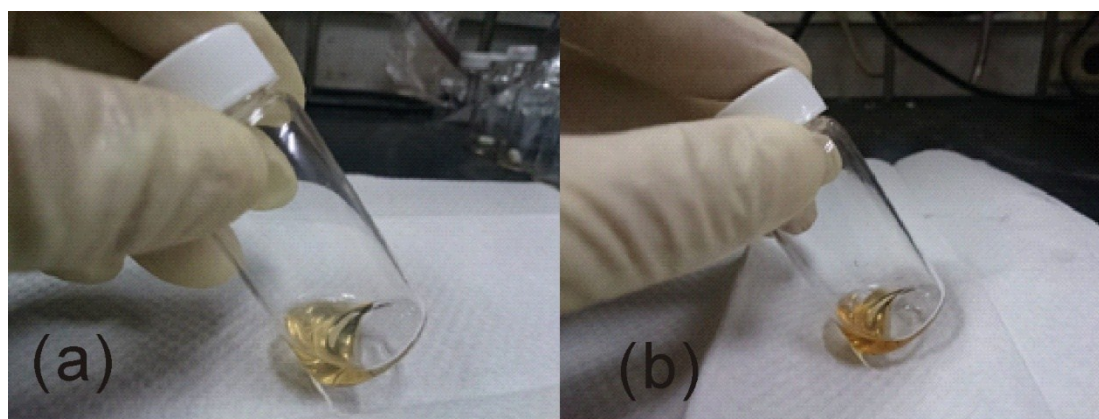

Figure S5. Pictures of dioxane solution of **P-tta** (a) freshly prepared solution and (b) the thermally treated solutions at 60 °C for 96 h.
